# Supplementary material for: Appetite Suppression and Altered Food Preferences Coincide with Changes in Appetite-Mediating Hormones During Energy Deficit at High Altitude, But Are Not Affected by Protein Intake
Source: PubMed Central journal article supplement — High Alt Med Biol. 2018 Jun 1;19(2):156–69. doi: 10.1089/ham.2017.0155 (PMC6014054; doi:10.1089/ham.2017.0155), 2018-06-01
Supplement: Supp_Table1.pdf [file Supp_Table1.pdf]

## Supplementary Data

SUPPLEMENTARY TABLE S1. FOOD IMAGES USED IN THE LEEDS FOOD PREFERENCE QUESTIONNAIRE

| <i>Fat and taste</i>     |                              |                             |                             |                            |
|--------------------------|------------------------------|-----------------------------|-----------------------------|----------------------------|
|                          | <i>High fat + Savory</i>     | <i>High fat + Sweet</i>     | <i>Low fat + Savory</i>     | <i>Low fat + Sweet</i>     |
| 1                        | Pizza                        | Chocolate                   | Sandwich                    | Apple                      |
| 2                        | Garlic bread                 | Ice cream                   | Pretzels                    | Skittles                   |
| 3                        | French fries                 | Cookies                     | Sliced turkey               | Pancakes                   |
| 4                        | Potato chips                 | Doughnut                    | Spinach salad               | Grapes                     |
| <i>Protein and taste</i> |                              |                             |                             |                            |
|                          | <i>High protein + Savory</i> | <i>High protein + Sweet</i> | <i>Low protein + Savory</i> | <i>Low protein + Sweet</i> |
| 1                        | Cheese slices                | Peanut snack bar            | Crackers                    | Chocolate pudding          |
| 2                        | Peanuts                      | Fruit yogurt                | Toast                       | Clementine                 |
| 3                        | Turkey                       | Yogurt, honey, & nuts       | Pasta                       | Berries                    |
| 4                        | Macaroni & cheese            | Baked beans                 | Garden salad                | Sugared gummies            |
