# Supplementary material for: Appetite Suppression and Altered Food Preferences Coincide with Changes in Appetite-Mediating Hormones During Energy Deficit at High Altitude, But Are Not Affected by Protein Intake
Source: PubMed Central journal article supplement — High Alt Med Biol. 2018 Jun 1;19(2):156–69. doi: 10.1089/ham.2017.0155 (PMC6014054; doi:10.1089/ham.2017.0155), 2018-06-01
Supplement: Supp_Table2.pdf [file Supp_Table2.pdf]

SUPPLEMENTARY TABLE S2. FOOD CRAVINGS WHILE CONSUMING A STANDARD-PROTEIN OR HIGHER PROTEIN ENERGY RESTRICTED DIET AT HIGH ALTITUDE

|                                                                            | <i>SL day 12</i> | <i>HA</i>    |               |               | <i>p-value</i> <sup>2</sup> |                    |                 |
|----------------------------------------------------------------------------|------------------|--------------|---------------|---------------|-----------------------------|--------------------|-----------------|
|                                                                            |                  | <i>Day 1</i> | <i>Day 10</i> | <i>Day 18</i> | <i>Diet</i>                 | <i>Day</i>         | <i>Diet*Day</i> |
| Control of Eating Questionnaire <sup>1</sup> (range: 0 [low] to 10 [high]) |                  |              |               |               |                             |                    |                 |
| Frequency and strength of cravings                                         |                  |              |               |               | 0.19                        | 0.03 <sup>3</sup>  | 0.58            |
| SP                                                                         | 4.9±2.9          | 3.8±2.6      | —             | 6.2±3.7       |                             |                    |                 |
| HP                                                                         | 6.3±1.8          | 5.9±1.5      | —             | 7.0±2.7       |                             |                    |                 |
| Craving savory                                                             |                  |              |               |               | 0.30                        | 0.29               | 0.55            |
| SP                                                                         | 5.0±2.2          | 4.1±2.4      | —             | 5.7±3.4       |                             |                    |                 |
| HP                                                                         | 5.9±1.9          | 5.8±1.6      | —             | 6.1±2.6       |                             |                    |                 |
| Craving sweets                                                             |                  |              |               |               | 0.99                        | 0.90               | 0.38            |
| SP                                                                         | 4.0±2.0          | 3.9±2.3      | —             | 5.0±3.9       |                             |                    |                 |
| HP                                                                         | 4.3±2.9          | 4.6±3.0      | —             | 3.9±2.3       |                             |                    |                 |
| Food Craving Inventory <sup>1</sup> (range: 1 [low] to 5 [high])           |                  |              |               |               |                             |                    |                 |
| Total score                                                                |                  |              |               |               | 0.68                        | 0.03 <sup>4</sup>  | 0.80            |
| SP                                                                         | 2.4±0.8          | 2.2±0.9      | 2.5±1.2       | 2.6±1.2       |                             |                    |                 |
| HP                                                                         | 2.7±0.5          | 2.3±0.8      | 2.8±1.1       | 2.7±1.1       |                             |                    |                 |
| High fat                                                                   |                  |              |               |               | 0.21                        | 0.005 <sup>5</sup> | 0.63            |
| SP                                                                         | 2.2±0.8          | 1.9±0.9      | 2.3±1.1       | 2.4±1.2       |                             |                    |                 |
| HP                                                                         | 2.6±0.8          | 2.3±0.7      | 3.0±1.2       | 3.0±1.1       |                             |                    |                 |
| High carbohydrate                                                          |                  |              |               |               | 0.93                        | 0.04 <sup>4</sup>  | 0.69            |
| SP                                                                         | 2.5±0.8          | 2.2±0.8      | 2.3±1.1       | 2.6±1.2       |                             |                    |                 |
| HP                                                                         | 2.6±0.5          | 2.1±0.8      | 2.5±1.2       | 2.6±1.1       |                             |                    |                 |
| Fast foods                                                                 |                  |              |               |               | 0.66                        | 0.02 <sup>5</sup>  | 0.86            |
| SP                                                                         | 2.8±1.1          | 2.7±1.0      | 3.2±1.3       | 3.2±1.5       |                             |                    |                 |
| HP                                                                         | 3.2±0.7          | 2.8±1.0      | 3.3±1.2       | 3.4±1.1       |                             |                    |                 |
| Sweets                                                                     |                  |              |               |               | 0.86                        | 0.60               | 0.85            |
| SP                                                                         | 2.4±1.0          | 2.4±1.0      | 2.6±1.6       | 2.6±1.3       |                             |                    |                 |
| HP                                                                         | 2.5±0.7          | 2.3±1.1      | 2.5±1.3       | 2.3±1.3       |                             |                    |                 |

Values are mean±SD. Volunteers consumed a hypocaloric standard-protein (SP, 1.1 g/kg/d, *n*=8) or higher protein (HP; 2.1 g/kg/d, *n*=9) diet while living at high altitude (HA, 4300 m).

<sup>1</sup>Questionnaires administered at sea level (SL) and HA asked about average cravings over the previous week.

<sup>2-5</sup>Linear mixed model with subject included as a random factor and Bonferroni corrections. <sup>3</sup>HA day 1 is significantly different from HA day 18 in the combined cohort (*p*<0.05). <sup>4</sup>No significant pairwise differences across days. <sup>5</sup>HA day 1 is significantly different from HA days 10 and 18 in the combined cohort (*p*<0.05).
